# Supplementary material
Source: Copernicus journal article supplement (doi:10.5194/acp-26-6727-2026)
Supplement: Supplementary file 1 [file acp-26-6727-2026-supplement.pdf]

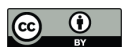

*Supplement of*

## **Organic amine weakens chloride depletion in coastal atmosphere**

**Aijing Song et al.**

*Correspondence to:* Lin Du (lindu@sdu.edu.cn)

The copyright of individual parts of the supplement might differ from the article licence.

## S1. Calculation of particle viscosity

The dry glass transition temperature of the organic components ( $T_{g,org}$ ) in SSA particles was first calculated using the number of carbon, hydrogen, and oxygen atoms ( $n_C$ ,  $n_H$ , and  $n_O$ ):

$$T_{g,org} = \left( n_C^0 + \ln(n_C) \right) b_C + \ln(n_H) b_H + \ln(n_C) \ln(n_H) b_{CH} + \ln(n_O) b_O + \ln(n_C) \ln(n_O) b_{CO} \quad (S1)$$

Here, the values of  $n_C^0$ ,  $b_C$ ,  $b_H$  and  $b_O$ ,  $b_{CH}$  and  $b_{CO}$  are best-fit parameters presented in Derieux et al. (2018). Then, the average glass transition temperature of organic–water mixtures ( $T_{g,org,w}$ ) can be calculated using the Gordon-Taylor equation (Derieux et al., 2018; Tumminello et al., 2021):

$$T_{g,org,w} = \frac{T_{g,w} f_{ALW} + \frac{1}{k_{GT}} f_{org} T_{g,org}}{f_{ALW} + \frac{1}{k_{GT}} f_{org}} \quad (S2)$$

$$f_{ALW} = \frac{m_{w,org}}{m_{w,org} + m_{org}} \quad (S3)$$

where  $T_{g,w}$  and  $k_{GT}$  are the glass transition temperature of water (136 K) and the Gordon-Taylor constant (1), respectively.  $m_{w,org}$  and  $m_{org}$  refer to the mass of water and organic components, respectively. Subsequently, the viscosity of the organic component ( $\eta_{org}$ ) can be obtained through the conversion of  $T_{g,org,w}$  using Eq.S4 and Eq.S5. Among them, the fragility parameter ( $z$ ) was assumed to be 12 (Tumminello et al., 2021).  $T$  is the experimental temperature.

$$T_0 = \frac{39.17 T_{g,org,w}}{z + 39.17} \quad (S4)$$

$$\log \eta_{org} = -5 + 0.434 \frac{T_0 z}{T - T_0} \quad (S5)$$

For the viscosity of inorganic components ( $\eta_{iorg}$ ), calculations can be performed using the viscosity of water at 25°C ( $\eta_w$ , 0.8904 cP), the mole fraction of cations in the solution ( $X_c$ ), the free energy associated with NaCl ( $E$ ), and the molar volume of

the hole formed by the movement of cations and anions ( $V$ ):

$$\eta_{inorg} = \frac{\eta_w e^{X_c E}}{1 + X_c V} \quad (S6)$$

where  $E$  and  $V$  are determined from the data presented by Goldsack and Franchetto (1977).

Finally, the SSA particle viscosity ( $\eta_{mix}$ ) calculated by Eq.S7 based on the assumption that the organic and inorganic components of SSA particles are homogeneous and internally-mixed (Tumminello et al., 2021).

$$\ln(\eta_{mix}) = \sum_{i=1}^N x_i \ln(\eta_i) \quad (S7)$$

Here,  $x_i$  and  $\eta_i$  are the mole fraction and viscosity of component  $i$  (organic or inorganic components), respectively.

Additionally, the Extended AIM Aerosol Thermodynamics Model (E-AIM, <https://www.aim.env.uea.ac.uk/aim/aim.php>) was used to assess the content of the components of SSA particles.

**Table S1.** Summary of model simulation conditions and results.

| Experiment <sup>a</sup> | [NO <sub>x</sub> ] <sub>0</sub> | [NH <sub>3</sub> ] <sub>0</sub> | HNO <sub>3</sub> exposure      | Cl exposure                    |
|-------------------------|---------------------------------|---------------------------------|--------------------------------|--------------------------------|
|                         | (ppb)                           | (ppb)                           | (molecules cm <sup>-3</sup> s) | (molecules cm <sup>-3</sup> s) |
| NA.0                    | 50                              | 0                               | 3.35439e+015                   | 1.05106e+010                   |
| NA.5                    | 50                              | 5                               | 3.12956e+015                   | 1.0508e+010                    |
| NA.20                   | 50                              | 20                              | 2.5492e+015                    | 1.05006e+010                   |

<sup>a</sup>Abbreviations used in experimental codes correspond to the reactants introduced into the model. “N” represents NO<sub>x</sub>, and “A” represents NH<sub>3</sub>. “NA.0-NA.20” represent 0 ppb – 20 ppb NH<sub>3</sub> concentrations, with a fixed initial NO<sub>x</sub> concentration of 50 ppb.

**Table S2.** Toxicity prediction results for chemical structures of identified organic chlorinated compounds.

| Molecular formula                                              | Oral rat pLD <sub>50</sub><br>(-log <sub>10</sub> (pred), mol kg <sup>-1</sup> ) | pLD <sub>50</sub><br>level* | Pred Developmental<br>Toxicity** | Pred<br>Mutagenicity** |
|----------------------------------------------------------------|----------------------------------------------------------------------------------|-----------------------------|----------------------------------|------------------------|
| C <sub>9</sub> H <sub>14</sub> ClNO <sub>9</sub>               | 2.29                                                                             | class 4                     | N/A                              | N/A                    |
| C <sub>7</sub> H <sub>13</sub> ClN <sub>2</sub> O <sub>4</sub> | 2.61                                                                             | class 3                     | 0.80                             | 0.33                   |
| C <sub>7</sub> H <sub>13</sub> ClN <sub>2</sub> O <sub>9</sub> | 2.29                                                                             | class 4                     | 0.83                             | 0.49                   |
| C <sub>6</sub> H <sub>10</sub> ClNO <sub>3</sub>               | 1.74                                                                             | class 4                     | 0.77                             | 0.24                   |
| C <sub>6</sub> H <sub>10</sub> ClNO <sub>4</sub>               | 2.36                                                                             | class 4                     | 0.78                             | 0.99                   |
| C <sub>7</sub> H <sub>14</sub> ClNO <sub>3</sub>               | 2.29                                                                             | class 4                     | 0.80                             | 0.95                   |
| C <sub>7</sub> H <sub>13</sub> Cl <sub>2</sub> NO <sub>3</sub> | 1.56                                                                             | class 5                     | 0.66                             | 0.07                   |

\*The class levels can be divided into five categories: class 1 (highest hazard, pLD<sub>50</sub> ≥ 4.3), class 2 (4.3 > pLD<sub>50</sub> > 3.3), class 3 (3.3 > pLD<sub>50</sub> > 2.5), class 4 (2.5 > pLD<sub>50</sub> > 1.69), and class 5 (likely hazard, 1.69 > pLD<sub>50</sub> > 1.3) (Europe, 2021; Li et al., 2025).

\*\*The class levels can be divided into two categories: class 1 (highest hazard, > 0.5), and class 2 (likely hazard, ≤ 0.5) (Europe, 2021; Li et al., 2025).

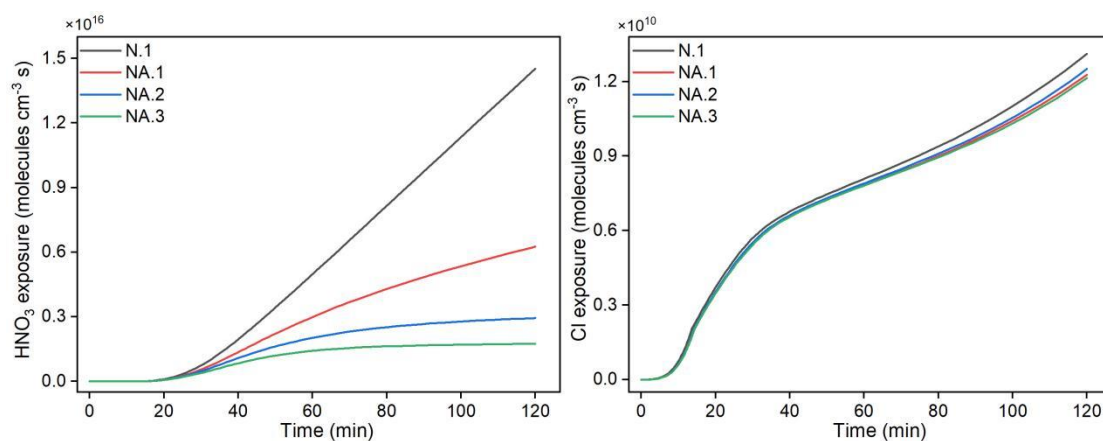

**Figure S1.** Time series of HNO<sub>3</sub> and Cl exposure for Exp.N.1-NA.3 obtained from model simulation.

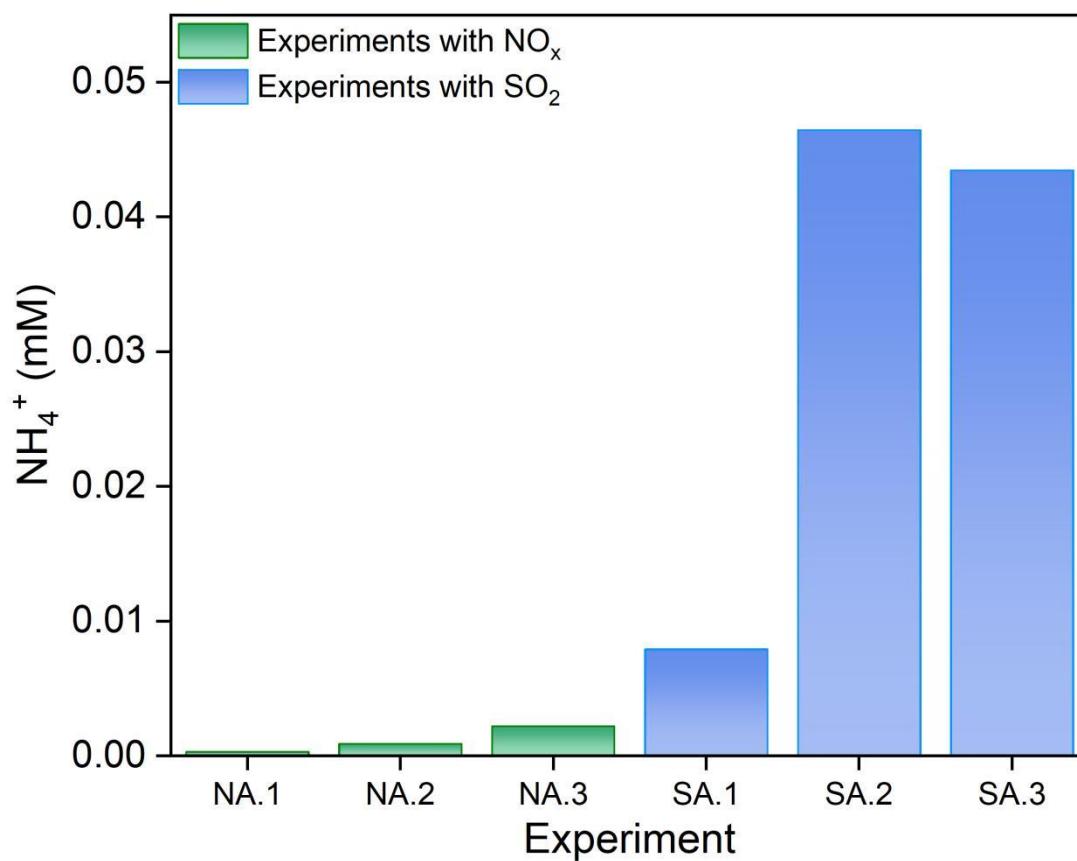

**Figure S2.** NH<sub>4</sub><sup>+</sup> concentration under different experimental conditions.

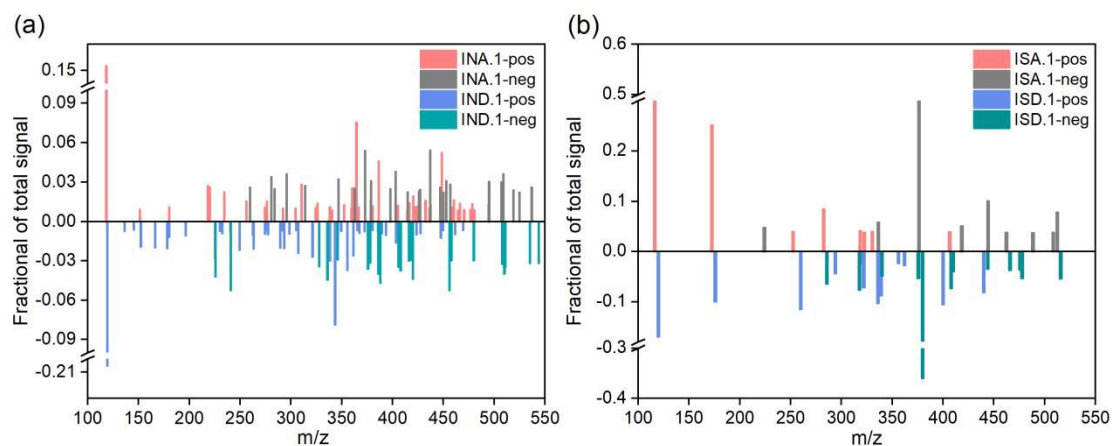

**Figure S3.** Mass spectra of organic chlorinated compounds for different experiments in the presence of (a)  $\text{NO}_x$  and (b)  $\text{SO}_2$ .

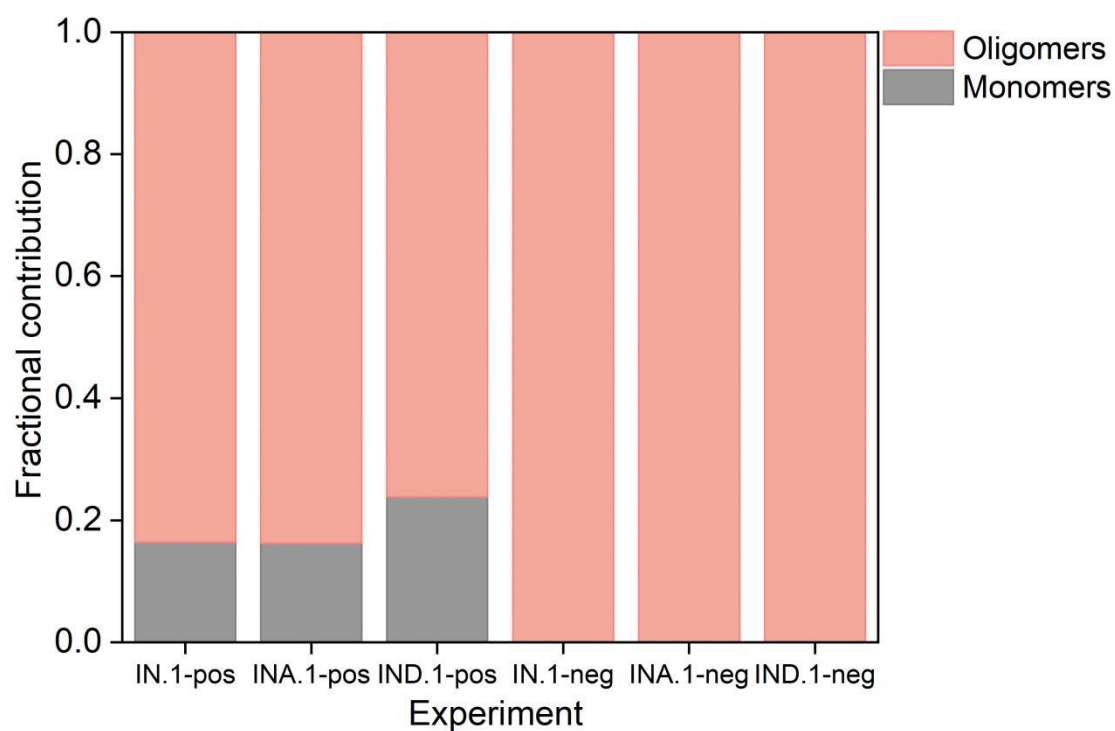

**Figure S4.** Fractional contribution of organic chlorinated monomers ( $C \leq 5$ ) and oligomers ( $C > 5$ ) for different experiments with  $\text{NO}_x$ .

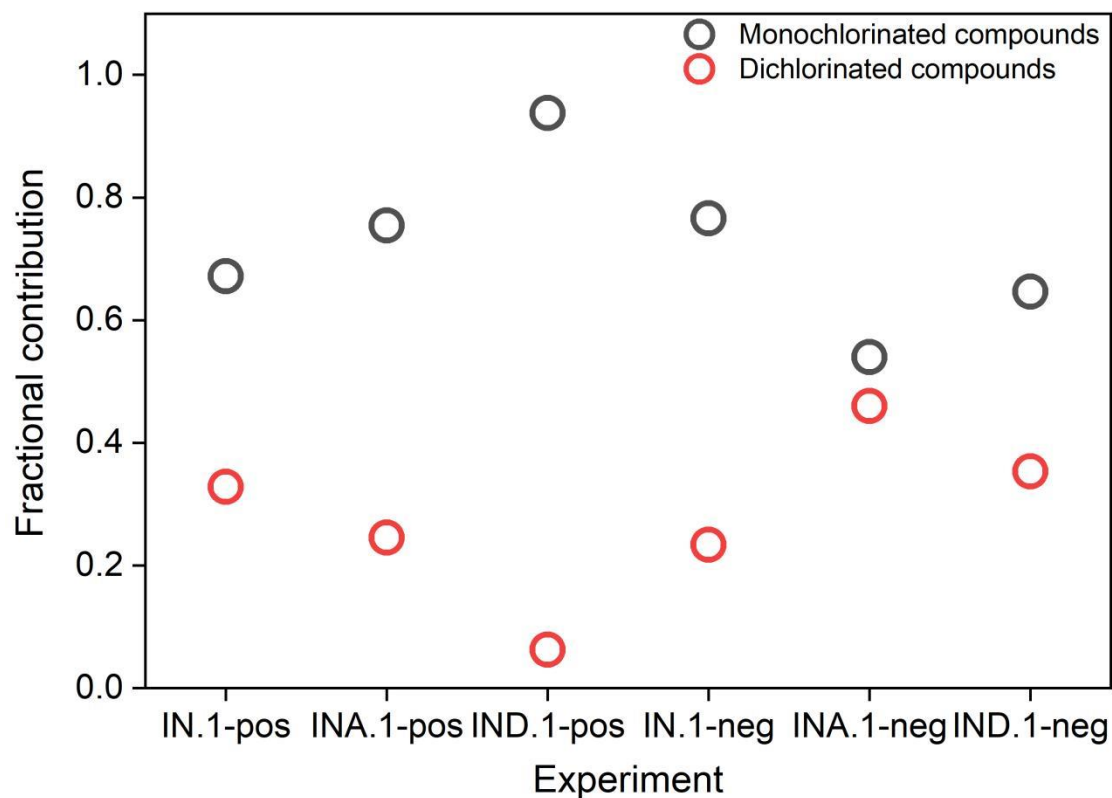

**Figure S5.** Fractional contribution of monochlorinated and dichlorinated compounds in the total organic chlorinated compounds for different experiments with  $\text{NO}_x$ .

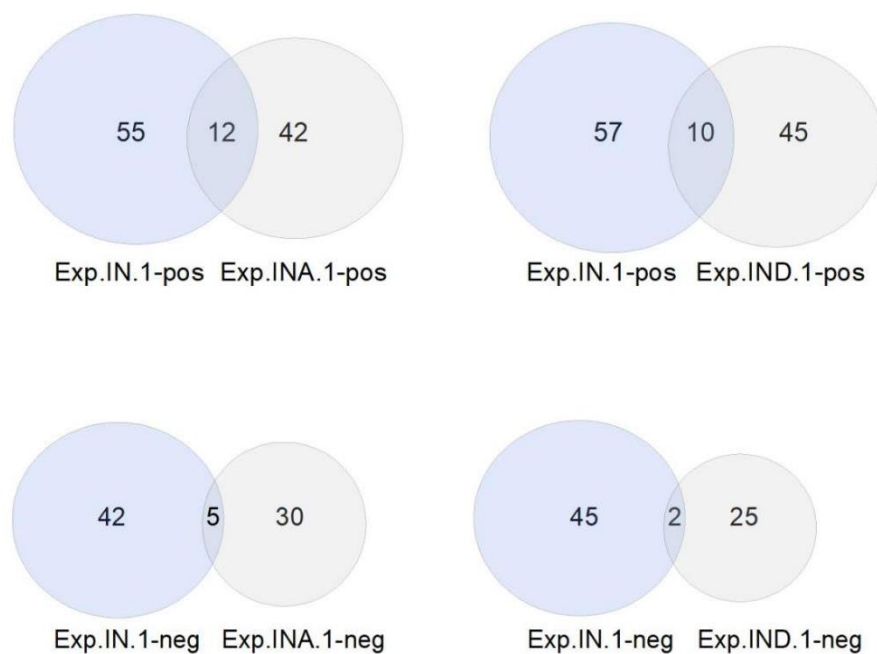

**Figure S6.** Venn diagram for all molecular formulas of organic chlorinated compounds between Exp.IN.1 and Exp.INA.1/Exp.IND.1. Numbers represent the count of molecular formulas within each subset.

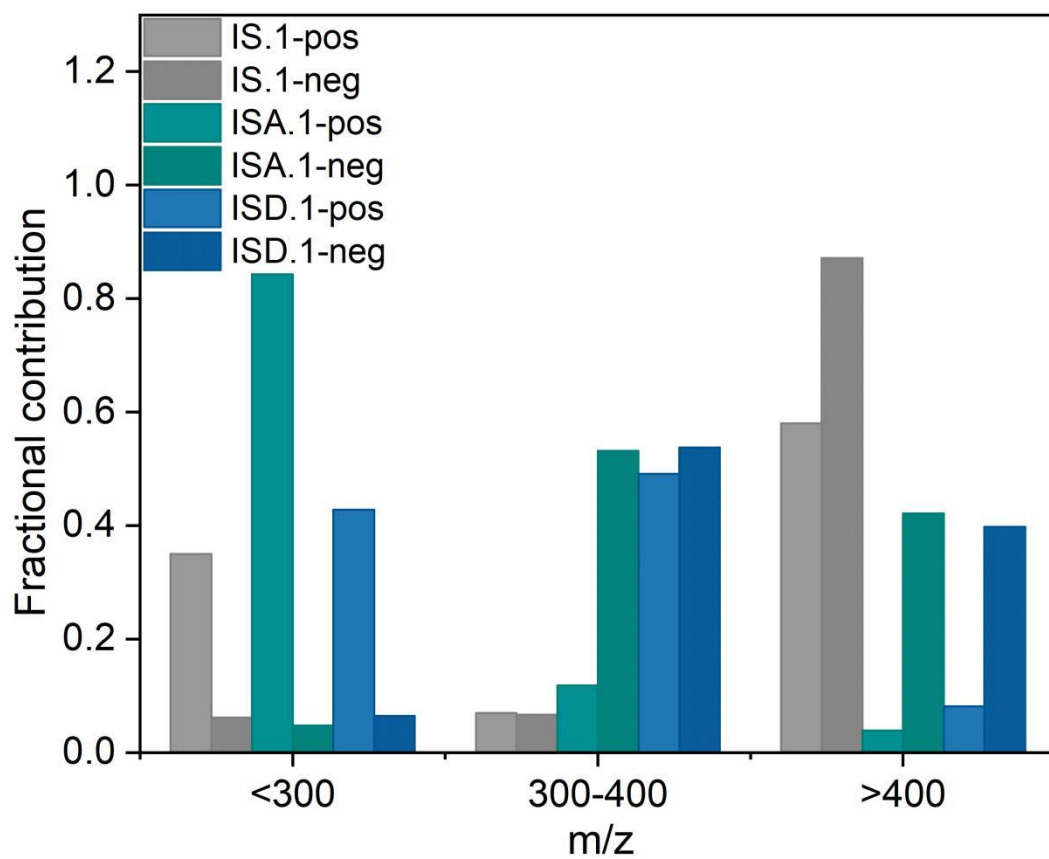

**Figure S7.** Distribution of identified molecules for different experiments with SO<sub>2</sub>.

## References

- DeRieux, W.-S. W., Li, Y., Lin, P., Laskin, J., Laskin, A., Bertram, A. K., Nizkorodov, S. A., and Shiraiwa, M.: Predicting the glass transition temperature and viscosity of secondary organic material using molecular composition, *Atmos. Chem. Phys.*, 18, 6331-6351, <https://doi.org/10.5194/acp-18-6331-2018>, 2018.
- Europe, U. N. E. C. f.: Globally Harmonized System of Classification and Labelling of Chemicals (GHS), *Glob. Harmon. Syst. Classif. Label. Chem. (GHS)*, <https://doi.org/10.18356/9789210052139>, 2021.
- Goldsack, D. E. and Franchetto, R.: The viscosity of concentrated electrolyte solutions. I. Concentration dependence at fixed temperature, *Can J. Chem.*, 55, 1062-1070, <https://doi.org/10.1139/v77-148>, 1977.
- Li, C., Yao, L., Wang, Y., Fang, M., Chen, X., Wang, L., Li, Y., Yang, G., and Wang, L.: Formation of chlorinated organic compounds from Cl atom-initiated reactions of aromatics and their detection in suburban Shanghai, *Atmos. Chem. Phys.*, 25, 11247-11260, <https://doi.org/10.5194/acp-25-11247-2025>, 2025.
- Tumminello, P. R., James, R. C., Kruse, S., Kawasaki, A., Cooper, A., Guadalupe-Diaz, I., Zepeda, K. L., Crocker, D. R., Mayer, K. J., Sauer, J. S., Lee, C., Prather, K. A., and Slade, J. H.: Evolution of sea spray aerosol particle phase state across a phytoplankton bloom, *ACS Earth Space Chem.*, 5, 2995-3007, <https://doi.org/10.1021/acsearthspacechem.1c00186>, 2021.
